# Supplementary figures and images for: Nanoparticles of amorphous calcium carbonate by miniemulsion: synthesis and mechanism
Source: Royal Society of Chemistry journal article supplement (doi:10.1039/b717057b), 2008-01-01

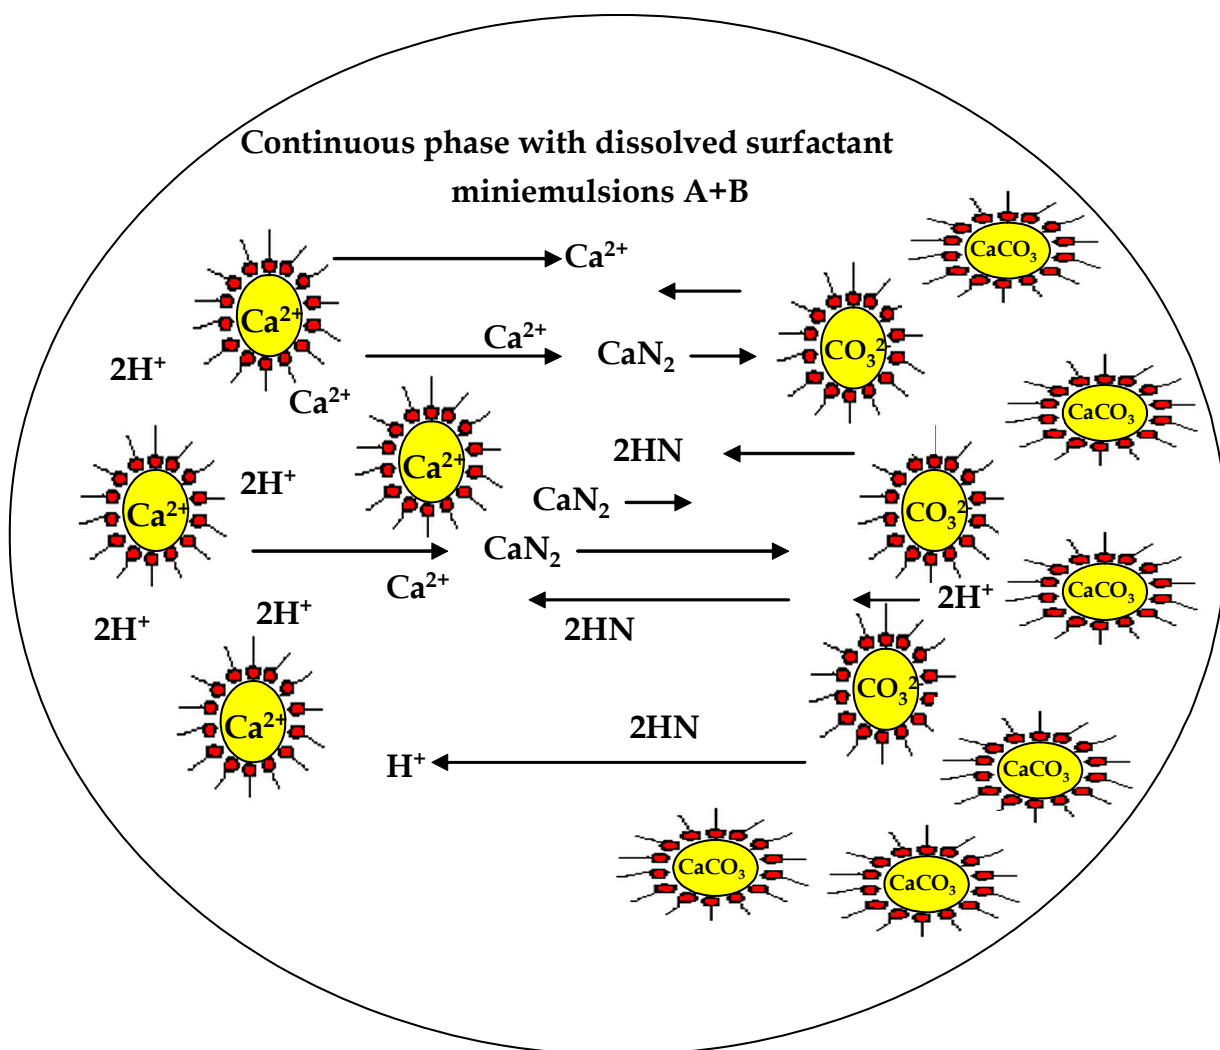

Supplement: b717057b-1.pdf [file b717057b-1.pdf]

**A** TGA profile of the  $\text{CaCO}_3$  obtained from polybutene-succinimide pentamine

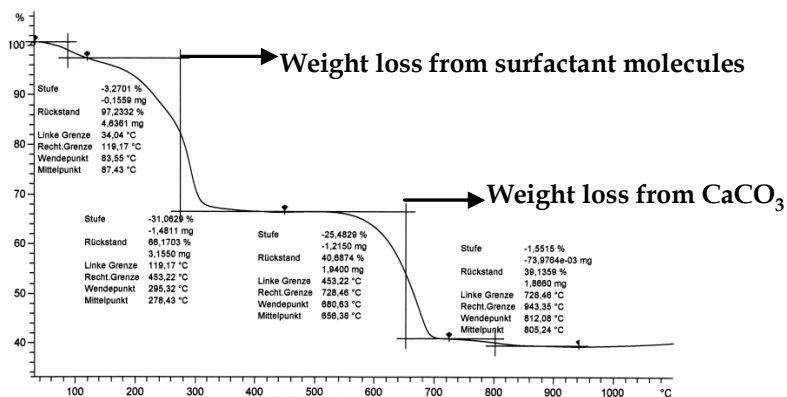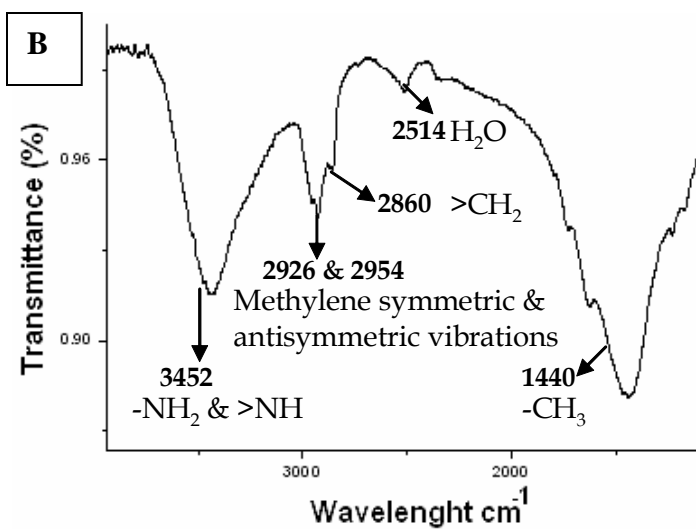

Supplement: b717057b-2.pdf [file b717057b-2.pdf]

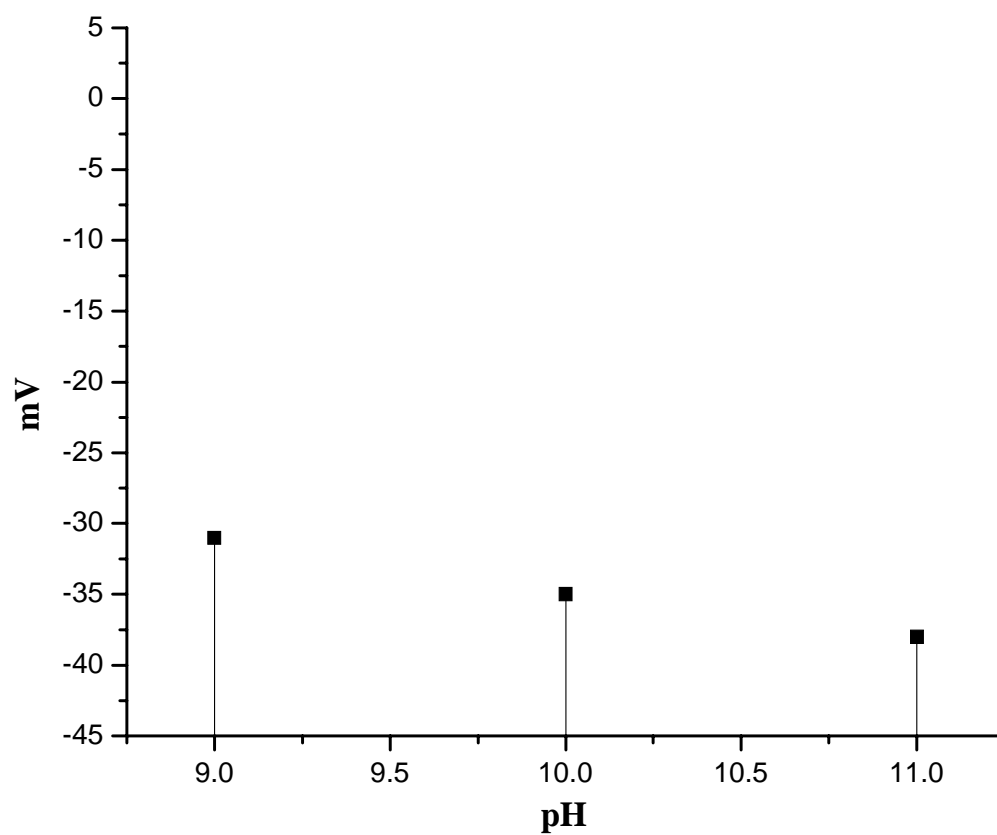

Supplement: b717057b-3.pdf [file b717057b-3.pdf]
